# Supplementary material
Source: Springer Nature journal article supplement (https://www.springermedizin.de/resource/supplementary/13058_2011_2932_MOESM9_ESM.pdf/9702794)

**A****S28**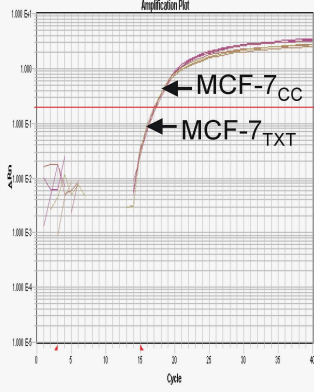**TNFAIP3**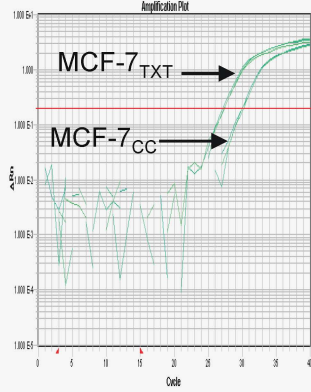**BIRC3**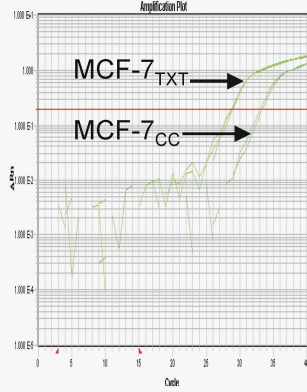**TNFSF10**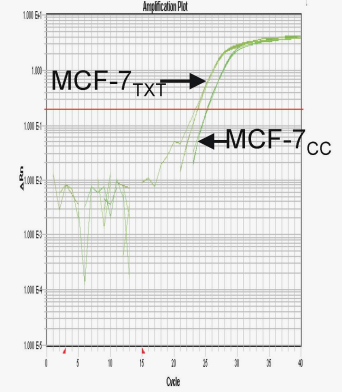**TNFSF14**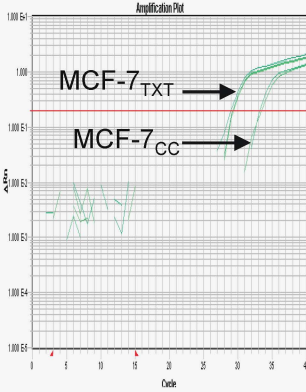**TNFSF13**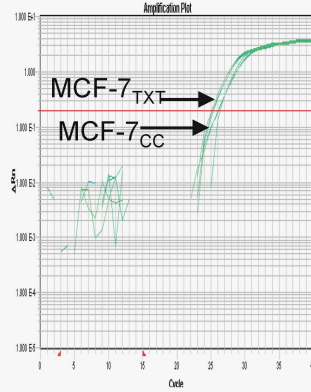**TLR1**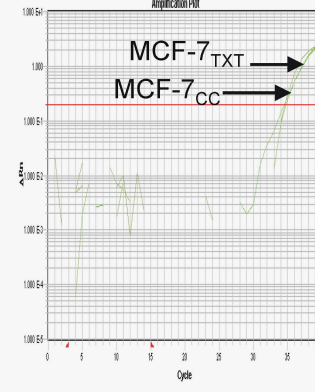**TLR6**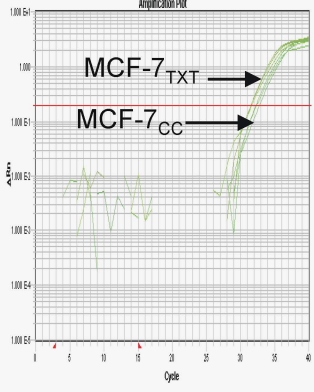**B****S28**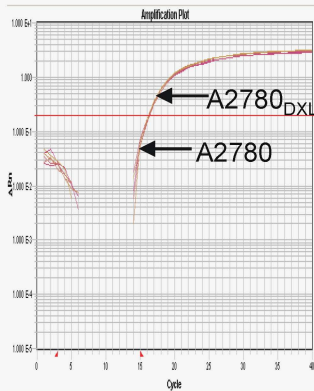**TNFAIP3**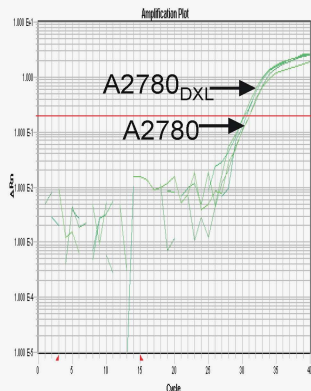**BIRC3**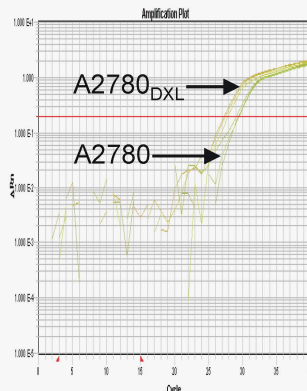**TNFSF10**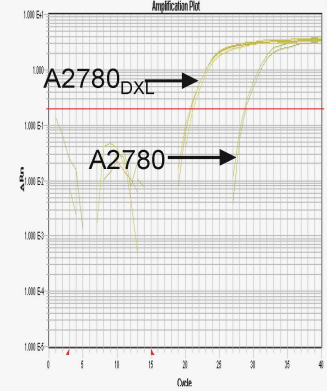**TLR1**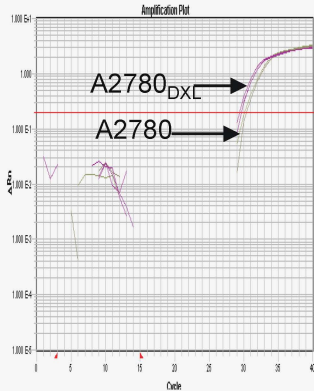**TLR6**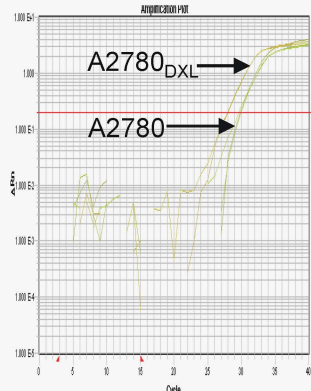

Supplement: MOESM9 [file 9702794]
